# Supplementary material for: Anthropogenic noise decreases activity and calling behavior in wild mice
Source: PeerJ journal article supplement (doi:10.7717/peerj.15297), 2023-06-14
Supplement: FileS3.xlsx [file FileS3.xlsx]

## Sheet: Sheet1
	Difference in Total Time Spent at the Focal Area
	glmmPQL(Time ~ treatment + night,
	random = ~ 1|ID, data=data, family = "Poisson")
	Difference in Total Seeds Consumed
	glmmPQL(Total_Seed ~ treatment + night,
	random = ~ 1|ID, data=data, family = "Poisson")
	Difference in latency to enter the focal area
	glmmPQL(Latency_to_FA~ treatment + night,
	random = ~ 1|ID, data=data, family = "Poisson")
	Difference in time spent in the focal area on the first visit
	glmmPQL(Time_in_FA ~ treatment + night,
	random = ~ 1|ID, data=data, family = "Poisson")
	Difference in latency to start foraging
	glmmPQL(Latency_to_Forage ~ treatment + night,
	random = ~ 1|ID, data=data, family = "Poisson")
	Difference in time spent foraging
	glmmPQL(Time_Foraging ~ treatment + night,
	random = ~ 1|ID, data=data, family = "Gaussian")
	Production of vocalizations
	glmmPQL(Calls ~ treatment + night,
	random = ~ 1|ID, data=data, family = "Poisson")
